# Supplementary material
Source: Springer Nature journal article supplement (https://www.springermedizin.de/resource/supplementary/12939_2013_476_MOESM2_ESM.pdf/9551244)
Supplement: MOESM2 [file 9551244]

Number of  
respondents 18-64 in  
the survey **2006**:  
15 414

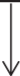

After excluding  
respondents without  
an id-number:  
15 403

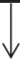

Those with answers  
on all questions used  
in the regression:  
12 769

Number of  
respondents 18-64 in  
the survey **2010**:  
12 589

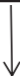

After excluding  
respondents without  
an id-number:  
12 566

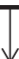

Those with answers  
on all questions used  
in the regression:  
10 044
